# Supplementary material for: RNA-seq and Tn-seq reveal fitness determinants of vancomycin-resistant Enterococcus faecium during growth in human serum
Source: PubMed Central journal article supplement (PMC5699109; doi:10.1186/s12864-017-4299-9), 2017-11-21
Supplement: 12864_2017_4299_MOESM6_ESM.pdf [file 12864_2017_4299_MOESM6_ESM.pdf]

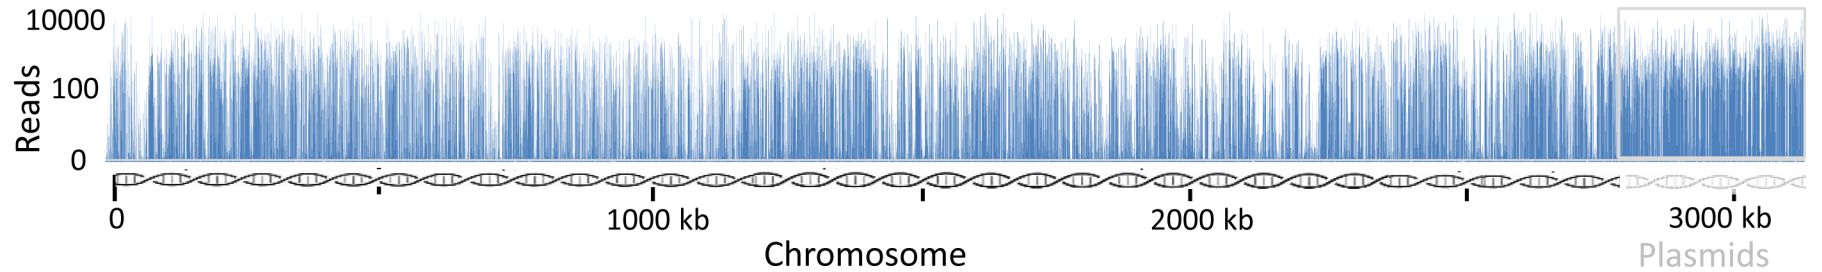

**Additional file 6.** Characterization of the *E. faecium* E745 transposon mutant library, showing the number of reads that were mapped to the *E. faecium* E745 chromosome and plasmids. The height of each peak represents the read abundance at a specific insertion site. On the y-axis, the number of mapped reads are shown in log scale.
